# Supplementary material for: In or on, a study of the influence of the binding site for TiO2 and MIL-101(Cr)
Source: Royal Society of Chemistry journal article supplement (doi:10.1039/d3dt00437f), 2023-01-01
Supplement: d3dt00437f1.pdf [file d3dt00437f1.pdf]

**In or on, a study of the influence of the binding site for TiO<sub>2</sub> and  
MIL-101(Cr)**

Jianwei Lin, Jing Chen, Yaling Ye, Yafeng Zhuang, Weiming Sun\*, Jinghua Chen,  
Zhizhong Han\*

School of Pharmacy, Fujian Medical University, Fuzhou 350122, China

\* Corresponding authors:

E-mail: zzhan@fjmu.edu.cn (Z. Han), sunwm@fjmu.edu.cn (W. Sun)

## 1. EDS elemental mapping

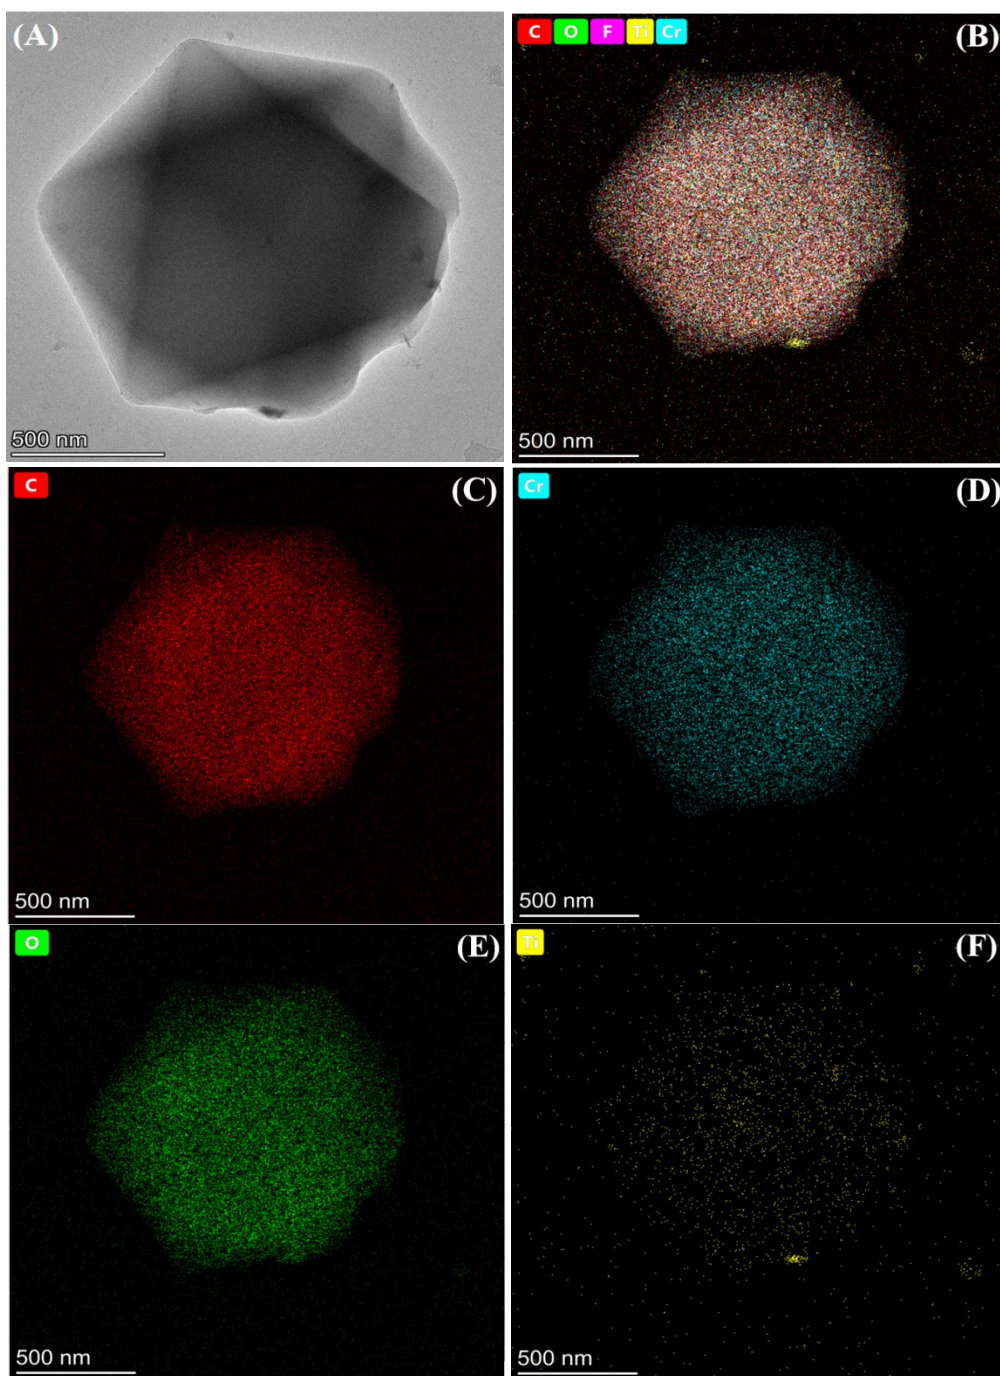

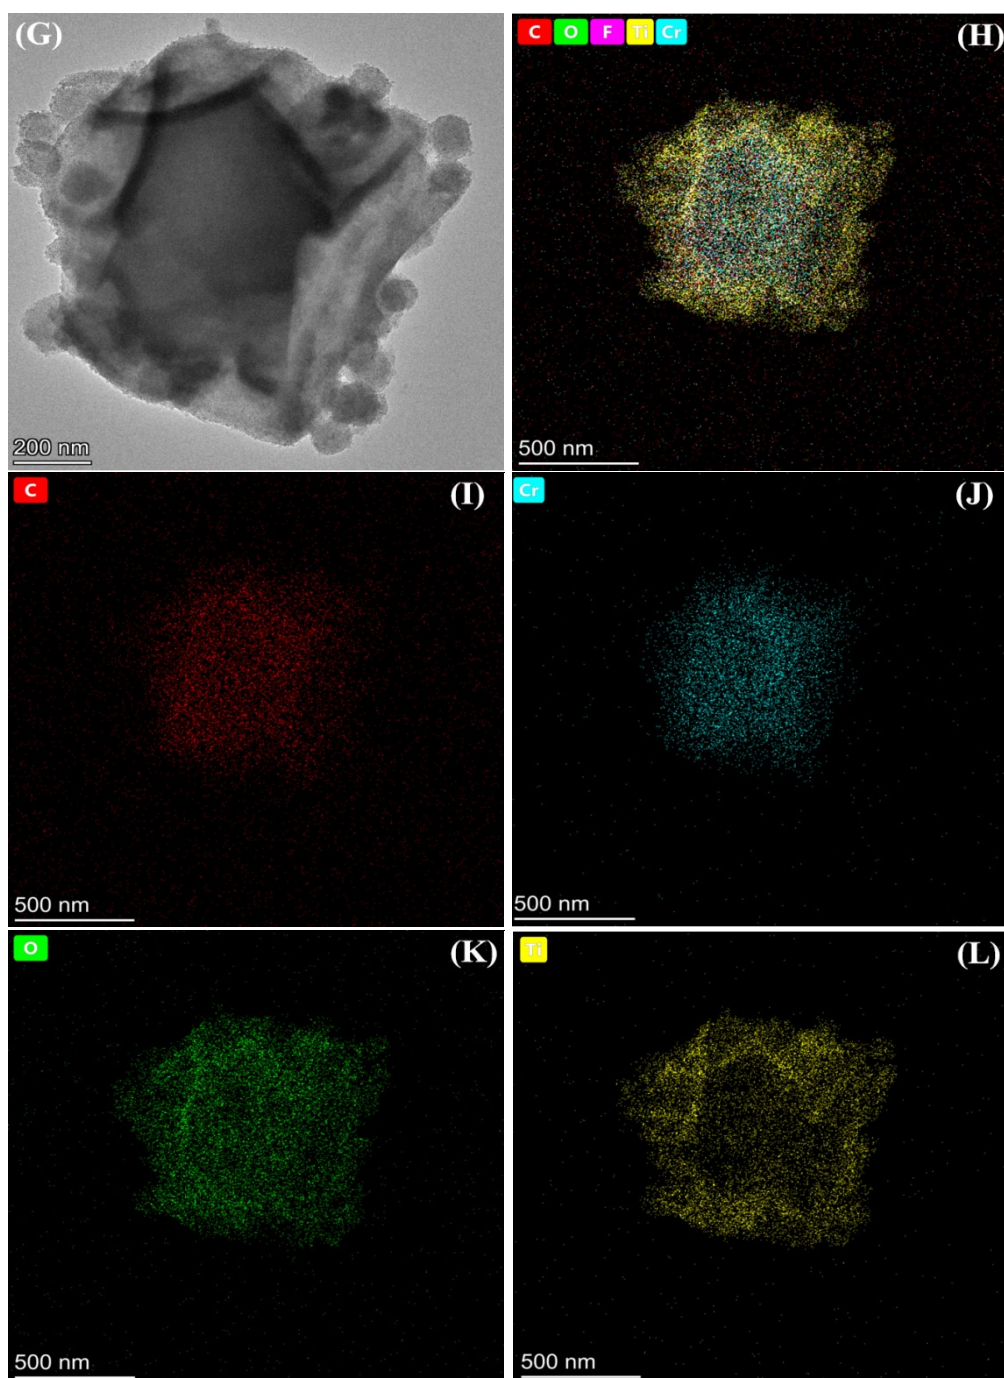

**Fig. S1** (A) TEM and (B) to (F) the element distribution of TiO<sub>2</sub>-in-MIL-101(Cr), (G)TEM and (H) to (L) the element distribution of TiO<sub>2</sub>-on-MIL-101(Cr).

## 2. Fluorescence, photoelectrochemistry and electrochemistry characterization

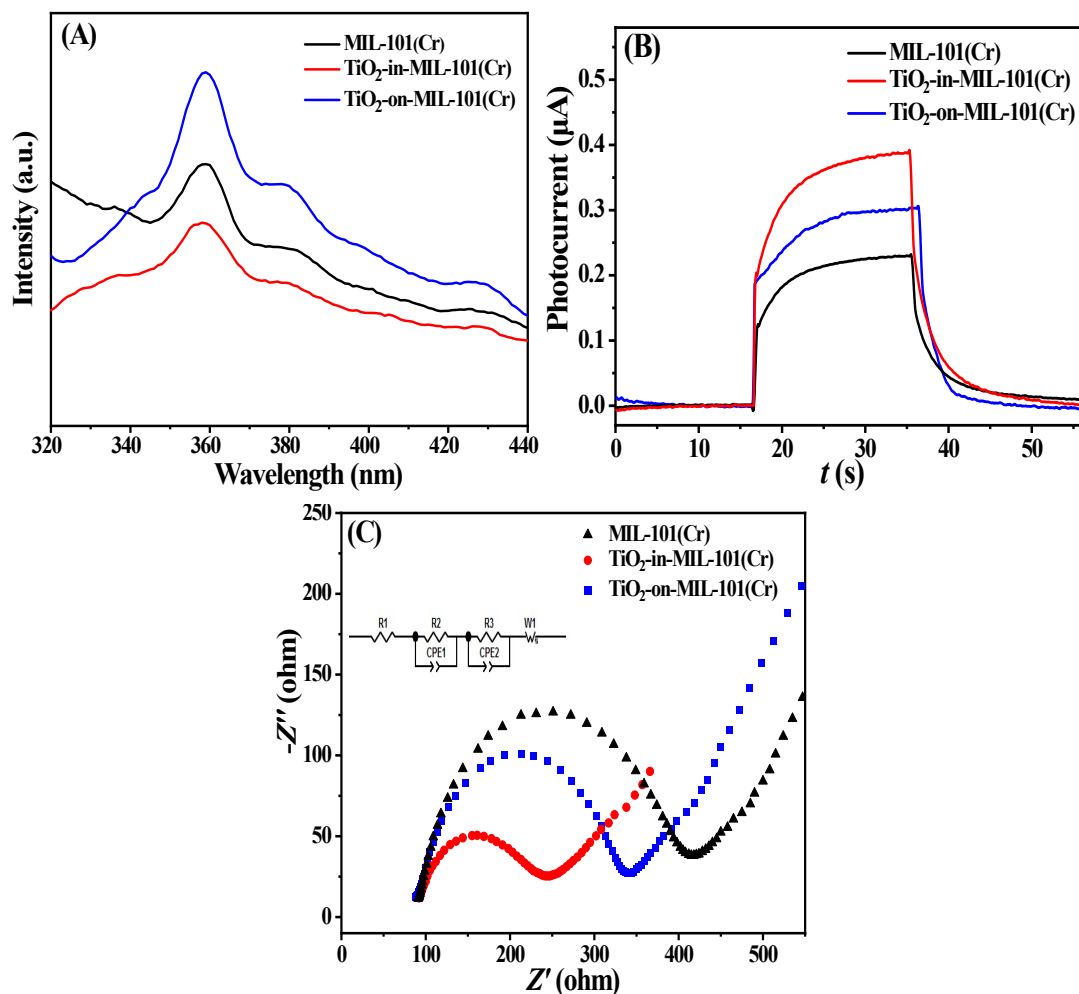

Fig. S2 (A) The fluorescence emission spectrum, (B) Photocurrent curves of MOFs and (C) Nyquist curves (inset is equivalent circuit diagram).

## 3. The kinetic process of MO adsorption and photocatalytic decolorization

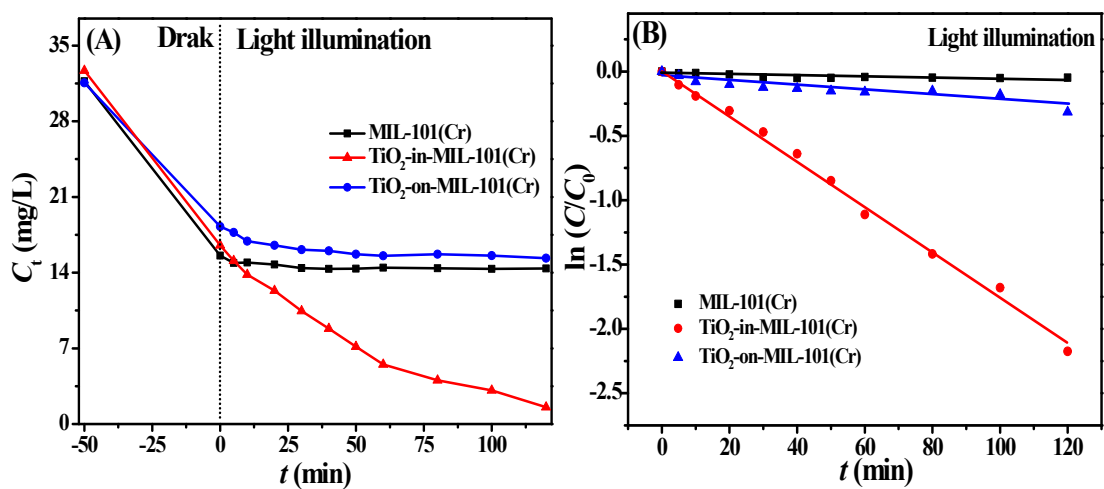

Fig. S3 (A) Adsorption and photocatalytic decolorization kinetics of MO in dark and under light and (B)  $\ln(C/C_0)$  as function of time.

#### 4. EPR characterization

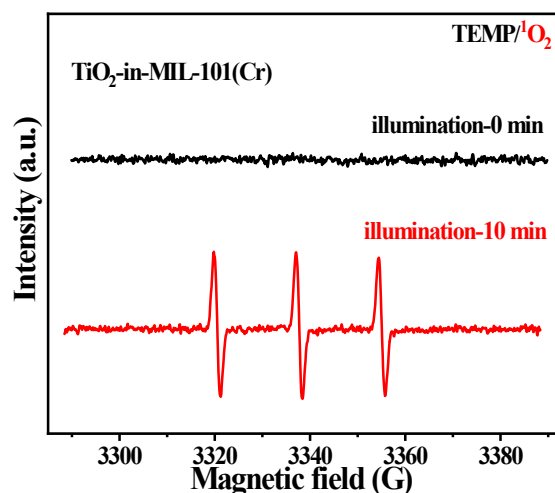

**Fig. S4** EPR spectra ( $\text{TEMP}/^1\text{O}_2$ ) of  $\text{TiO}_2\text{-in-MIL-101(Cr)}$ .

#### 5. XPS characterization

For C, the ratio of the intensity of the C-O and C=O peaks for  $\text{TiO}_2\text{-on-MIL-101(Cr)}$  is greater than that of  $\text{TiO}_2\text{-in-MIL-101(Cr)}$  before illumination (Figs. S5C and S5D), this is for  $\text{TiO}_2$  combined with -COOH on the surface of MIL-101(Cr) to form Ti-O-C-OH bond, resulting in an increase in the content of C-O. For Cr, a new peak of 574.8 eV representing  $\text{Cr}^{2+}$  appears in  $\text{TiO}_2\text{-in-MIL-101(Cr)}$  after illumination (Fig. S5E),<sup>1</sup> which is not observed in  $\text{TiO}_2\text{-on-MIL-101(Cr)}$  (Fig. S5F). In addition, for the O 1s spectrum, the peaks near 533.0, 531.9 and 530.0 eV corresponds to -OH of  $\text{H}_2\text{O}$ , O-C=O and Ti-O, respectively.<sup>2,3</sup> The ratio of the peak intensity of O-C=O to that of Ti-O for  $\text{TiO}_2\text{-in-MIL-101(Cr)}$  (Fig. S5H) is significantly greater than that for  $\text{TiO}_2\text{-on-MIL-101(Cr)}$  (Fig. S5G) before illumination. It can be interpreted that  $\text{TiO}_2$  of  $\text{TiO}_2\text{-in-MIL-101(Cr)}$  combines with Cr to form Ti-O-Cr bond, which has almost no effect on -COOH. However, for  $\text{TiO}_2\text{-on-MIL-101(Cr)}$ ,  $\text{TiO}_2$  combines with -COOH on the surface of MIL-101(Cr) to form Ti-O-C-OH bond, which leads to the reduction of -COOH, which is in accordance with the results of DFT calculations. Furthermore, the intensity ratios of O-C=O to Ti-O peaks reduce after illumination, which may be attributed to the adsorption of  $\text{O}_2$  on the surface  $\text{TiO}_2$  that lead to the formation of Ti-O bond. The binding energy peaks at 458.6 eV and 464.5 eV corresponds to  $\text{Ti}^{4+}$  of  $\text{TiO}_2$ .<sup>4</sup> The XPS peaks of Ti for  $\text{TiO}_2\text{-in-MIL-101(Cr)}$  and  $\text{TiO}_2\text{-on-MIL-101(Cr)}$  did not change significantly after illumination, indicating that



the photocatalytic reaction has no effect on the oxidation state of Ti (Figs. S5I and S5J).

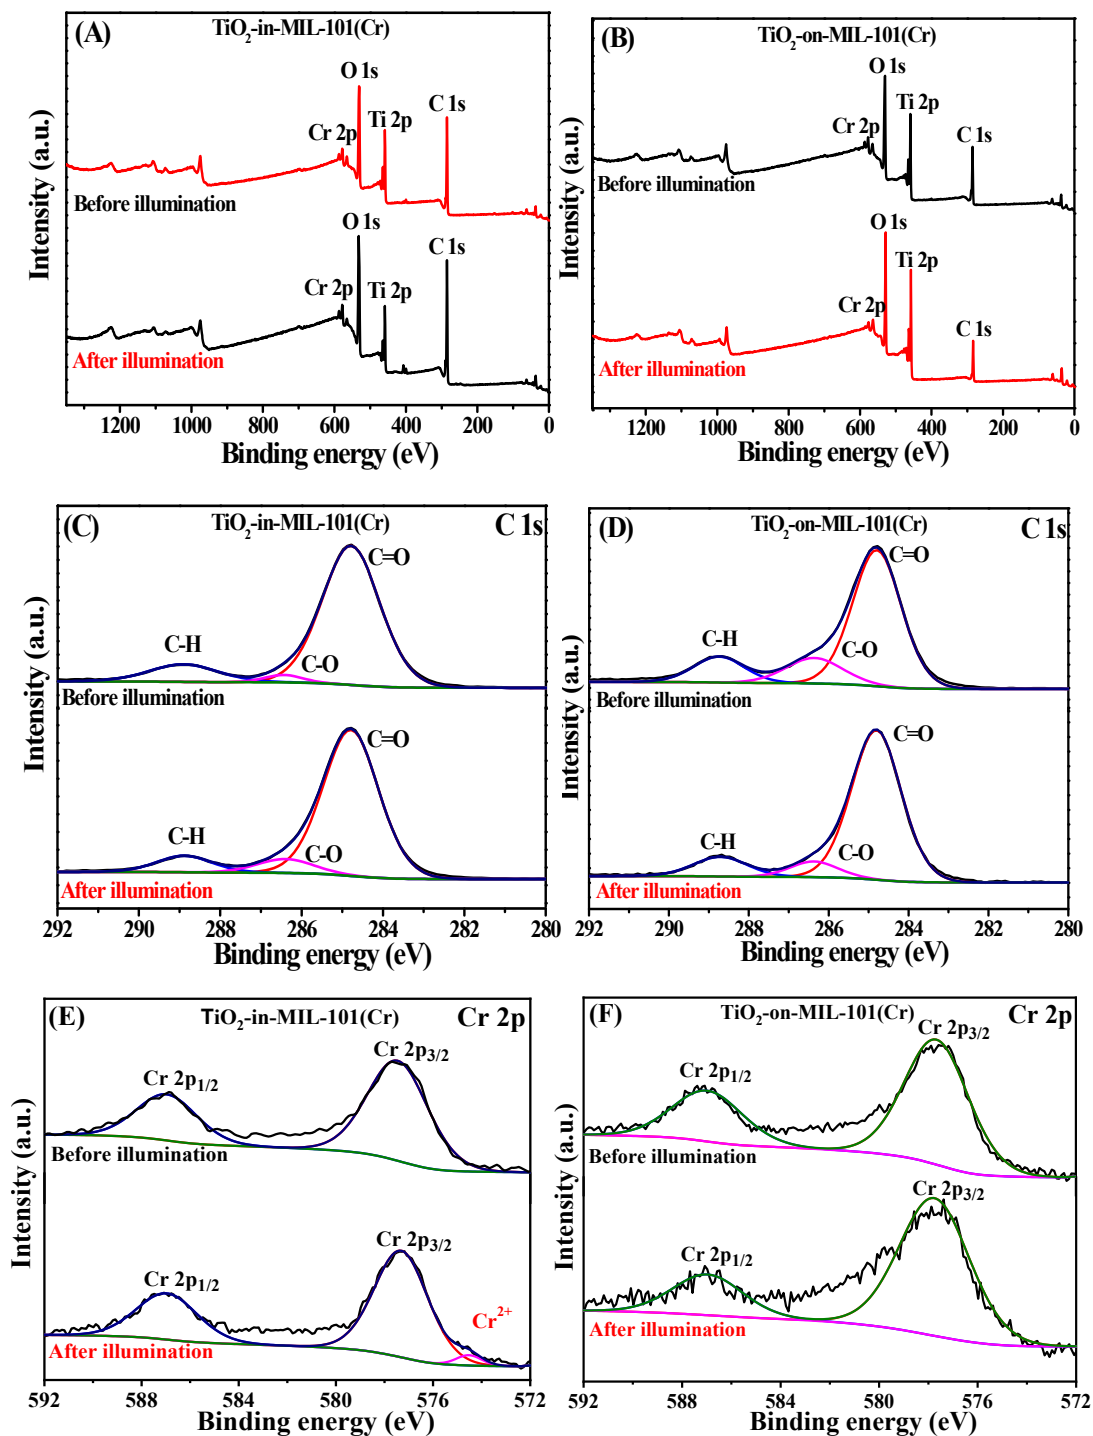

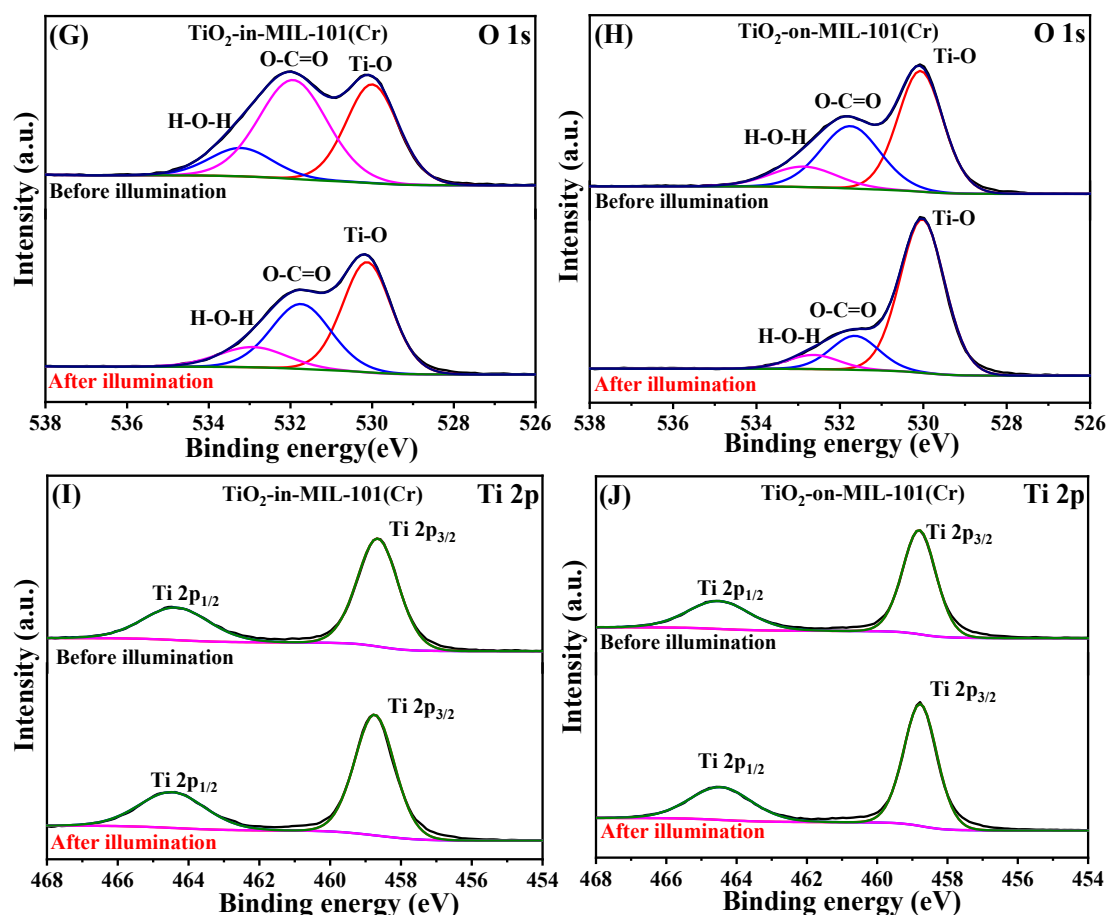

Fig. S5 (A-J) XPS spectra of  $\text{TiO}_2$ -in-MIL-101(Cr) and  $\text{TiO}_2$ -on-MIL-101(Cr) before and after illumination.

## 6. Results from DFT calculations

Table S1 Binding energy of  $\text{TiO}_2$  and MIL-101(Cr) in the aqueous and alcoholic phases

| Binding sites | Aqueous phase  |                  | Alcoholic phases |                  |
|---------------|----------------|------------------|------------------|------------------|
|               | $E(\text{eV})$ | $E_b(\text{eV})$ | $E(\text{eV})$   | $E_b(\text{eV})$ |
| Ti-O-Cr       | -4589.50       | 1.83             | -4589.55         | 3.60             |
| Ti-O-C-OH     | -4589.52       | 2.51             | -4589.46         | 1.09             |

Table S2 NPA charges of  $\text{TiO}_2$  in the aqueous and alcoholic phases

| Sample                         | Aqueous phase           |                        | Alcoholic phases        |                        |
|--------------------------------|-------------------------|------------------------|-------------------------|------------------------|
|                                | Excited state ( $ e $ ) | Ground state ( $ e $ ) | Excited state ( $ e $ ) | Ground state ( $ e $ ) |
| $\text{TiO}_2$ -in-MIL-101(Cr) | -0.184                  | -0.225                 | -0.313                  | -0.742                 |
| $\text{TiO}_2$ -on-MIL-101(Cr) | -0.277                  | -0.277                 | -0.282                  | -0.283                 |

## References

- 1 R. Hossain, A. Billah, M. Ishizaki, S. Kubota, F. Hirose and B. Ahmmad, Oxygen vacancy mediated room-temperature ferromagnetism and band gap narrowing in  $\text{DyFe}_{0.5}\text{Cr}_{0.5}\text{O}_3$  nanoparticles, *Dalton Trans.*, 2021, 50, 9519-9528.
- 2 Z. L. Cheng, L. Gan, X. Chu, D. W. Wang, Z. M. Qi, J. Jiang and T. J. Zhang, Investigation of the microwave dielectric properties of the  $\text{Li}_{4x/3}\text{Zn}_{2-2x}\text{Ti}_{1+2x/3}\text{O}_4$  system by P–V–L theory and vibration spectroscopy, *Ceram. Int.*, 2021, 47, 34695-34703.
- 3 J. F. Chen, X. D. Zhang, X. Y. Shi, F. K. Bi, Y. Yang and Y. X. Wang, Synergistic effects of octahedral  $\text{TiO}_2$ -MIL-101(Cr) with two heterojunctions for enhancing visible-light photocatalytic degradation of liquid tetracycline and gaseous toluene, *J. Colloid Interface Sci.*, 2020, 579, 37-49.
- 4 W. Wu, T. T. Yao, Y. Xiang, H. Zou, Y. Zhou, Efficient removal of methyl orange by a flower-like  $\text{TiO}_2$ /MIL-101(Cr) composite nanomaterial. *Dalton Trans.*, 2020, 49, 5722-2729.

## Appendix

### Optimized structures and Cartesian coordinates

#### 1. Water solvent

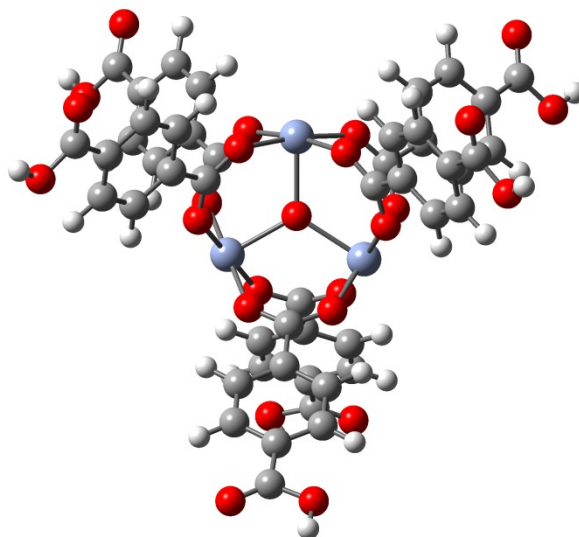

MOF

Energies = -3965.701237 a.u

|    |    |             |             |             |
|----|----|-------------|-------------|-------------|
| O  | -1 | -0.00064600 | 0.01730400  | 0.15227400  |
| Cr | -1 | 0.00980600  | 1.90448700  | -0.97840400 |
| Cr | -1 | -0.00137400 | -0.02623100 | 2.35184300  |
| Cr | -1 | -0.01051100 | -1.85580600 | -1.00157200 |



|   |   |             |             |             |
|---|---|-------------|-------------|-------------|
| C | 0 | -1.80845400 | 0.04257300  | -2.57340900 |
| O | 0 | -1.36741600 | -1.11353000 | -2.21343600 |
| O | 0 | -1.35845100 | 1.18983600  | -2.19790600 |
| C | 0 | 1.80847900  | 0.02323100  | -2.57250100 |
| O | 0 | 1.36877800  | 1.17472100  | -2.19766900 |
| O | 0 | 1.35792000  | -1.12860600 | -2.21080600 |
| C | 0 | -1.80904300 | 2.34658900  | 1.40169800  |
| O | 0 | -1.34131600 | 2.60636600  | 0.21522600  |
| O | 0 | -1.38476100 | 1.46707800  | 2.22284700  |
| C | 0 | 1.84039400  | 2.31825700  | 1.39860600  |
| C | 0 | 1.80994600  | -2.36127700 | 1.37202500  |
| C | 0 | -1.84399400 | -2.33571900 | 1.36583600  |
| O | 0 | 1.38441900  | -1.50560300 | 2.21840900  |
| O | 0 | 1.34284400  | -2.58160600 | 0.17893400  |
| O | 0 | -1.40918400 | -1.48531500 | 2.21271900  |
| O | 0 | -1.37499600 | -2.56572100 | 0.17515500  |
| O | 0 | 1.37035300  | 2.58789500  | 0.21522800  |
| O | 0 | 1.40513900  | 1.44591200  | 2.22157200  |
| C | 0 | -3.01481200 | -3.17372600 | 1.76856300  |
| C | 0 | -3.53544100 | -4.12647000 | 0.88600200  |
| C | 0 | -3.58125100 | -2.99455200 | 3.03588000  |
| C | 0 | -4.62387100 | -4.90297500 | 1.26891900  |
| H | 0 | -3.08010800 | -4.24666500 | -0.08891000 |
| C | 0 | -4.66843000 | -3.76951400 | 3.41772700  |
| H | 0 | -3.15979900 | -2.25104200 | 3.70087500  |
| C | 0 | -5.18845100 | -4.72224800 | 2.53568900  |
| H | 0 | -5.04119000 | -5.64536000 | 0.60126100  |
| H | 0 | -5.12933600 | -3.65462900 | 4.39193000  |
| C | 0 | 2.96574400  | -3.21794600 | 1.77861900  |
| C | 0 | 3.52908200  | -3.04973100 | 3.04882000  |
| C | 0 | 3.47562800  | -4.17707700 | 0.89670200  |
| C | 0 | 4.60242500  | -3.84203900 | 3.43419300  |
| H | 0 | 3.11613500  | -2.30093300 | 3.71321300  |
| C | 0 | 4.55022500  | -4.97090900 | 1.28313600  |
| H | 0 | 3.02296600  | -4.28854900 | -0.08049000 |
| C | 0 | 5.11174200  | -4.80110200 | 2.55277200  |
| H | 0 | 5.06063000  | -3.73596000 | 4.41066800  |
| H | 0 | 4.95914000  | -5.71843300 | 0.61601900  |
| C | 0 | 3.01650400  | 3.13986700  | 1.82152900  |
| C | 0 | 3.58579000  | 2.92148800  | 3.08138500  |
| C | 0 | 3.53939700  | 4.11511800  | 0.96531100  |
| C | 0 | 4.67812200  | 3.67953800  | 3.48205300  |
| H | 0 | 3.16247300  | 2.16120500  | 3.72594500  |
| C | 0 | 4.63296300  | 4.87480000  | 1.36705400  |
| H | 0 | 3.08188600  | 4.26552600  | -0.00435600 |
| C | 0 | 5.20048800  | 4.65465800  | 2.62625200  |
| H | 0 | 5.14131900  | 3.53425800  | 4.45111700  |
| H | 0 | 5.05206400  | 5.63407000  | 0.71976600  |
| C | 0 | -2.96743400 | 3.18978000  | 1.83083200  |
| C | 0 | -3.53383500 | 2.98200900  | 3.09378100  |
| C | 0 | -3.47661000 | 4.17473100  | 0.97744300  |
| C | 0 | -4.60955300 | 3.76037200  | 3.50038600  |
| H | 0 | -3.12130200 | 2.21393600  | 3.73609000  |
| C | 0 | -4.55356000 | 4.95471300  | 1.38512300  |
| H | 0 | -3.02157200 | 4.31672500  | 0.00533900  |
| C | 0 | -5.11821600 | 4.74516400  | 2.64741300  |
| H | 0 | -5.07011400 | 3.62372000  | 4.47195900  |
| H | 0 | -4.96183200 | 5.72178500  | 0.74011800  |
| C | 0 | -2.95467400 | 0.05321300  | -3.52765300 |
| C | 0 | -3.49025200 | -1.15758500 | -3.98103400 |
| C | 0 | -3.48544900 | 1.27383900  | -3.96118600 |
| C | 0 | -4.55950100 | -1.15097100 | -4.86982600 |
| H | 0 | -3.06150100 | -2.08830700 | -3.63130800 |
| C | 0 | -4.55367300 | 1.27914600  | -4.84857600 |
| H | 0 | -3.05434800 | 2.19793000  | -3.59723900 |
| C | 0 | -5.08905300 | 0.06927300  | -5.30157600 |
| H | 0 | -4.98845000 | -2.07588900 | -5.23230600 |
| H | 0 | -4.98807600 | 2.20665300  | -5.20298700 |
| C | 0 | 2.95381700  | 0.02281100  | -3.52786200 |
| C | 0 | 3.48941700  | 1.23828400  | -3.96847600 |
| C | 0 | 3.48352300  | -1.19319400 | -3.97547200 |

|   |   |             |             |             |
|---|---|-------------|-------------|-------------|
| C | 0 | 4.55743500  | 1.24103100  | -4.85880400 |
| H | 0 | 3.06163100  | 2.16530600  | -3.60787200 |
| C | 0 | 4.55068300  | -1.18916000 | -4.86411300 |
| H | 0 | 3.05238800  | -2.12103900 | -3.62128000 |
| C | 0 | 5.08589000  | 0.02535700  | -5.30464500 |
| H | 0 | 4.98623600  | 2.16970000  | -5.21177100 |
| H | 0 | 4.98421900  | -2.11293800 | -5.22911400 |
| C | 0 | -6.22709100 | 0.13819600  | -6.24635300 |
| O | 0 | -6.73688600 | 1.17866800  | -6.66072000 |
| O | 0 | -6.65540500 | -1.10695800 | -6.61397500 |
| H | 0 | -7.41860700 | -1.03058600 | -7.24636000 |
| C | 0 | 6.22249200  | -0.03399600 | -6.25179500 |
| O | 0 | 6.73181400  | -1.07032200 | -6.67697500 |
| O | 0 | 6.65071400  | 1.21470100  | -6.60725700 |
| H | 0 | 7.41270400  | 1.14436000  | -7.24183800 |
| C | 0 | 6.25546600  | -5.61676700 | 3.01860900  |
| O | 0 | 6.79292600  | -5.51376200 | 4.12095600  |
| O | 0 | 6.65694600  | -6.51557600 | 2.06917600  |
| H | 0 | 7.42435400  | -7.04777200 | 2.40982600  |
| C | 0 | -6.34652700 | -5.51956000 | 2.99783100  |
| O | 0 | -6.88748100 | -5.40618200 | 4.09744500  |
| O | 0 | -6.75781400 | -6.41342200 | 2.04791800  |
| H | 0 | -7.53469300 | -6.93336100 | 2.38603200  |
| C | 0 | -6.26452200 | 5.54415800  | 3.13509800  |
| O | 0 | -6.80516700 | 5.40575100  | 4.23200000  |
| O | 0 | -6.66600300 | 6.47048900  | 2.21247400  |
| H | 0 | -7.43561200 | 6.99005700  | 2.56740900  |
| C | 0 | 6.36420600  | 5.43203900  | 3.10758200  |
| O | 0 | 6.90758900  | 5.28421800  | 4.20189800  |
| O | 0 | 6.77667600  | 6.35199900  | 2.18341100  |
| H | 0 | 7.55660700  | 6.85845100  | 2.53476200  |

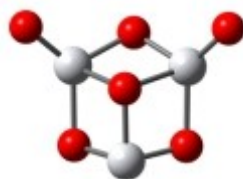

(TiO<sub>2</sub>)<sub>3</sub>

Energies = -623.730625 a.u

|    |             |             |             |
|----|-------------|-------------|-------------|
| Ti | 0.00067700  | 1.82099000  | 0.30105100  |
| O  | -1.39560900 | 1.31668000  | -0.61890400 |
| O  | 1.39736500  | 1.31570900  | -0.61796500 |
| O  | -0.00017800 | 0.10951300  | 0.99716900  |
| Ti | 1.42278600  | -0.60554600 | -0.19958100 |
| Ti | -1.42345200 | -0.60456700 | -0.19950000 |
| O  | 2.52006100  | -1.44456600 | 0.70996300  |
| O  | -0.00070600 | -1.53426500 | -0.91090600 |
| O  | -2.52096300 | -1.44298300 | 0.71022400  |

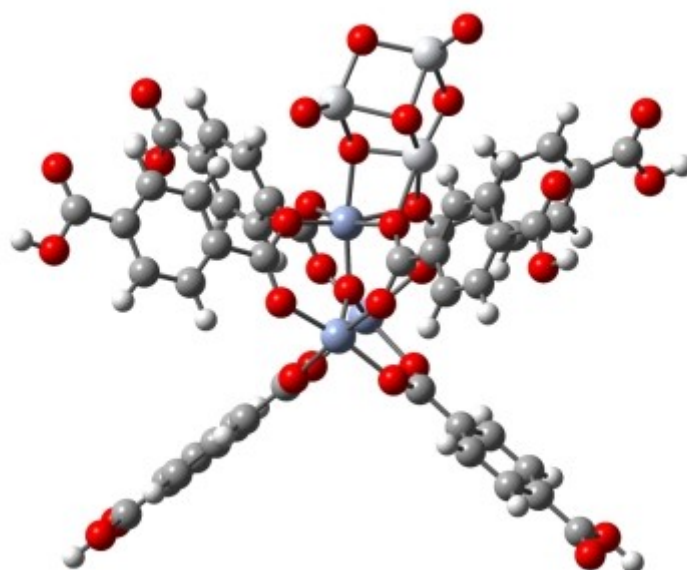

MOF-(TiO<sub>2</sub>)<sub>3</sub>-C

Energies = -4589.499205 a.u

|    |    |             |             |             |
|----|----|-------------|-------------|-------------|
| O  | 0  | -0.50344600 | 0.61970900  | -0.12233400 |
| Cr | 0  | -0.86254200 | 1.93767900  | 1.54541300  |
| Cr | 0  | 0.01222700  | -1.07222000 | 0.27143900  |
| Cr | 0  | -0.75195600 | 1.28928500  | -1.76267900 |
| C  | 0  | -3.05872100 | 2.55813900  | -0.38083300 |
| O  | 0  | -2.45244800 | 2.12662200  | -1.44254100 |
| O  | 0  | -2.55323100 | 2.58634700  | 0.79115400  |
| C  | 0  | 0.40401200  | 3.74273000  | -0.47532200 |
| O  | 0  | 0.09379000  | 3.46108100  | 0.73348900  |
| O  | 0  | 0.13221700  | 2.99172800  | -1.49511500 |
| C  | 0  | -1.88266800 | -0.68760400 | 2.54607600  |
| O  | 0  | -1.84490800 | 0.58691600  | 2.59374900  |
| O  | 0  | -1.19907700 | -1.41383600 | 1.71486800  |
| C  | 0  | 1.68268500  | 0.49813800  | 2.41089700  |
| C  | 0  | 1.79547500  | -0.27470100 | -2.14384700 |
| C  | 0  | -1.75356700 | -1.49092500 | -2.04886200 |
| O  | 0  | 1.64267800  | -0.98201300 | -1.03809100 |
| O  | 0  | 0.92520800  | 0.57517000  | -2.51770700 |
| O  | 0  | -1.13009700 | -1.93514200 | -1.00538900 |
| O  | 0  | -1.66462100 | -0.27853800 | -2.47108600 |
| O  | 0  | 0.80068900  | 1.39363700  | 2.48201800  |
| O  | 0  | 1.59041600  | -0.53171500 | 1.56623500  |
| C  | -1 | -2.62900500 | -2.43568700 | -2.77807900 |
| C  | -1 | -3.37996000 | -1.95492700 | -3.85633000 |
| C  | -1 | -2.74897000 | -3.76806500 | -2.36646600 |
| C  | -1 | -4.25267300 | -2.80580200 | -4.52614500 |
| H  | -1 | -3.26981100 | -0.92041000 | -4.15611000 |
| C  | -1 | -3.62091000 | -4.61726500 | -3.03498100 |
| H  | -1 | -2.15651400 | -4.11618900 | -1.52953600 |
| C  | -1 | -4.37111900 | -4.13678700 | -4.11314700 |
| H  | -1 | -4.84215300 | -2.45364100 | -5.36253800 |
| H  | -1 | -3.73636800 | -5.65389400 | -2.74040800 |
| C  | -1 | 3.01438900  | -0.46509900 | -2.97298900 |
| C  | -1 | 3.96092500  | -1.42658100 | -2.60059000 |
| C  | -1 | 3.23544800  | 0.35643400  | -4.08380200 |
| C  | -1 | 5.12771600  | -1.56402900 | -3.34088500 |
| H  | -1 | 3.76631700  | -2.05053400 | -1.73719300 |
| C  | -1 | 4.40382500  | 0.21815600  | -4.82544500 |
| H  | -1 | 2.48847300  | 1.09281400  | -4.35214200 |
| C  | -1 | 5.34840100  | -0.74313100 | -4.45153100 |
| H  | -1 | 5.87986200  | -2.29883200 | -3.07812000 |
| H  | -1 | 4.59368400  | 0.84351400  | -5.68795800 |
| C  | -1 | 2.85940200  | 0.60999400  | 3.29170300  |

|    |    |             |             |             |
|----|----|-------------|-------------|-------------|
| C  | -1 | 3.82131500  | -0.40668400 | 3.28159100  |
| C  | -1 | 3.03520200  | 1.74609600  | 4.08920300  |
| C  | -1 | 4.95814700  | -0.28425200 | 4.06961800  |
| H  | -1 | 3.66187900  | -1.27631600 | 2.65628500  |
| C  | -1 | 4.17349900  | 1.86822300  | 4.87899300  |
| H  | -1 | 2.27721000  | 2.51911400  | 4.08008800  |
| C  | -1 | 5.13359300  | 0.85126500  | 4.86707500  |
| H  | -1 | 5.72112600  | -1.05393600 | 4.08353200  |
| H  | -1 | 4.32809000  | 2.73880800  | 5.50293300  |
| C  | -1 | -2.78095700 | -1.37868400 | 3.49567600  |
| C  | -1 | -2.88912100 | -2.77382700 | 3.52562300  |
| C  | -1 | -3.57759900 | -0.58652200 | 4.32964400  |
| C  | -1 | -3.79508200 | -3.37391000 | 4.39019400  |
| H  | -1 | -2.26098800 | -3.36493300 | 2.87085700  |
| C  | -1 | -4.48442000 | -1.18773300 | 5.19602600  |
| H  | -1 | -3.47574700 | 0.49057500  | 4.28845400  |
| C  | -1 | -4.59109800 | -2.58199100 | 5.22406600  |
| H  | -1 | -3.90249900 | -4.45142700 | 4.43669100  |
| H  | -1 | -5.10939600 | -0.59288100 | 5.84922900  |
| C  | -1 | -4.43853100 | 3.05233000  | -0.52553600 |
| C  | -1 | -5.05246700 | 3.08561200  | -1.78267800 |
| C  | -1 | -5.12437300 | 3.48871900  | 0.61410700  |
| C  | -1 | -6.35548900 | 3.55550600  | -1.90359200 |
| H  | -1 | -4.50050100 | 2.74309200  | -2.64892900 |
| C  | -1 | -6.42591800 | 3.95742900  | 0.49212400  |
| H  | -1 | -4.62880300 | 3.45412500  | 1.57611800  |
| C  | -1 | -7.03957500 | 3.99058300  | -0.76404600 |
| H  | -1 | -6.84851600 | 3.58931400  | -2.86621600 |
| H  | -1 | -6.98465900 | 4.30185900  | 1.35453800  |
| C  | -1 | 1.13304500  | 5.01087200  | -0.70678700 |
| C  | -1 | 1.45042400  | 5.80732900  | 0.39924500  |
| C  | -1 | 1.52556400  | 5.39193400  | -1.99532500 |
| C  | -1 | 2.16206900  | 6.98826800  | 0.21953200  |
| H  | -1 | 1.13501500  | 5.49090200  | 1.38555000  |
| C  | -1 | 2.23691500  | 6.57124600  | -2.17345500 |
| H  | -1 | 1.26820000  | 4.76000000  | -2.83594900 |
| C  | -1 | 2.55398400  | 7.36733300  | -1.06834000 |
| H  | -1 | 2.41760900  | 7.61843300  | 1.06124000  |
| H  | -1 | 2.55617700  | 6.89422100  | -3.15748100 |
| C  | -1 | -8.42814300 | 4.50028700  | -0.83161400 |
| O  | -1 | -9.08169900 | 4.89476400  | 0.13348900  |
| O  | -1 | -8.91134100 | 4.48376800  | -2.11038500 |
| H  | -1 | -9.84318400 | 4.82967400  | -2.12580800 |
| C  | -1 | 3.31357100  | 8.61302600  | -1.32083700 |
| O  | -1 | 3.68817400  | 8.99754900  | -2.42807400 |
| O  | -1 | 3.55681200  | 9.30058300  | -0.16451900 |
| H  | -1 | 4.06722200  | 10.13006300 | -0.36380000 |
| C  | -1 | 6.60902600  | -0.93583000 | -5.20260500 |
| O  | -1 | 7.47773600  | -1.76153600 | -4.92297100 |
| O  | -1 | 6.70343300  | -0.07730200 | -6.26302300 |
| H  | -1 | 7.55807500  | -0.23003300 | -6.74722500 |
| C  | -1 | -5.28251500 | -5.08785900 | -4.78786100 |
| O  | -1 | -5.43181100 | -6.26763400 | -4.47087900 |
| O  | -1 | -5.95472300 | -4.49814300 | -5.82268200 |
| H  | -1 | -6.55731700 | -5.15962600 | -6.25571800 |
| C  | -1 | -5.53742900 | -3.27714800 | 6.12487300  |
| O  | -1 | -5.67873500 | -4.49779100 | 6.19352200  |
| O  | -1 | -6.25349000 | -2.39512400 | 6.88632000  |
| H  | -1 | -6.87914300 | -2.89026200 | 7.47930000  |
| C  | -1 | 6.36381400  | 0.92596900  | 5.68635500  |
| O  | -1 | 7.24400800  | 0.06635900  | 5.71752900  |
| O  | -1 | 6.41486200  | 2.07883100  | 6.42041900  |
| H  | -1 | 7.24939700  | 2.09971700  | 6.96018700  |
| Ti | 0  | 2.53185400  | -2.14917500 | 0.58587600  |
| O  | 0  | 3.48536300  | -3.03935700 | 1.74051000  |
| O  | 0  | 0.88888800  | -2.87449900 | 0.61034000  |
| O  | 0  | 2.94641600  | -3.54459200 | -0.59927700 |
| Ti | 0  | 1.24495900  | -4.54182600 | -0.47952200 |
| Ti | 0  | 3.81619500  | -4.70929600 | 0.73079400  |
| O  | 0  | 0.83421200  | -4.97317500 | -2.01740800 |
| O  | 0  | 2.30811000  | -5.73194500 | 0.42934600  |

|   |   |            |             |            |
|---|---|------------|-------------|------------|
| O | 0 | 5.25446100 | -5.24248000 | 0.11831600 |
|---|---|------------|-------------|------------|

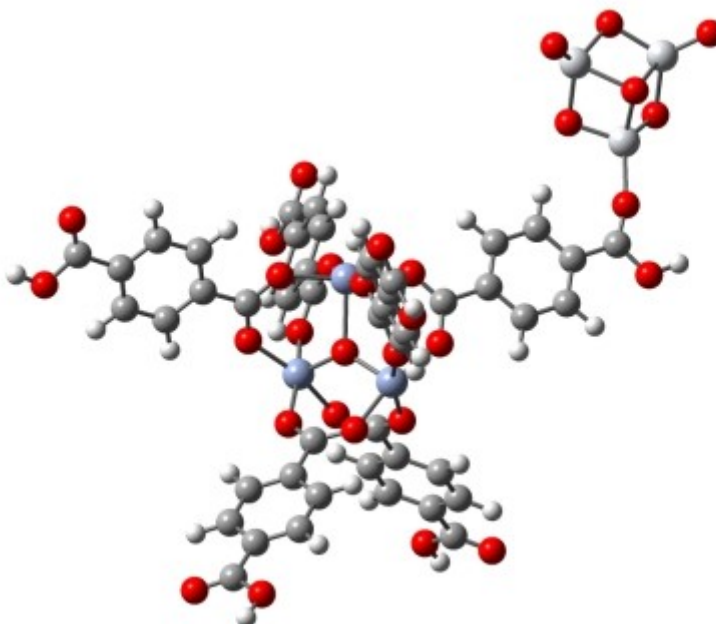

MOF-(TiO<sub>2</sub>)<sub>3</sub>-S

Energies = -4589.524209 a.u

|    |    |             |             |             |
|----|----|-------------|-------------|-------------|
| O  | 0  | -1.95233400 | 0.33103800  | -0.08942000 |
| Cr | 0  | -1.74453900 | 0.09275200  | -1.87275900 |
| Cr | 0  | -0.71006000 | -0.95212500 | 1.19778700  |
| Cr | 0  | -2.97575500 | 1.55513900  | 0.77076200  |
| C  | -1 | -1.93761100 | 3.04142200  | -1.59350700 |
| O  | -1 | -2.49961700 | 3.03829900  | -0.43384800 |
| O  | -1 | -1.63224900 | 2.01127800  | -2.30433400 |
| C  | -1 | -4.62915400 | 0.62666000  | -1.50926900 |
| O  | -1 | -3.66216700 | 0.19100700  | -2.24064300 |
| O  | -1 | -4.52678700 | 1.21784700  | -0.36884200 |
| C  | 0  | 1.13178200  | -0.30397500 | -1.10412400 |
| O  | 0  | 0.18784200  | 0.00741900  | -1.93275500 |
| O  | 0  | 0.95436400  | -0.69792500 | 0.09641100  |
| C  | -1 | -1.58720400 | -2.78015800 | -1.08738700 |
| C  | -1 | -3.33751500 | -0.68843400 | 2.71534500  |
| C  | 0  | -0.58682800 | 1.73567300  | 2.56898700  |
| O  | -1 | -2.23055000 | -1.28595200 | 2.49804800  |
| O  | -1 | -3.73556100 | 0.43548700  | 2.19712100  |
| O  | 0  | -0.11883200 | 0.56417100  | 2.36350800  |
| O  | 0  | -1.66513100 | 2.20187400  | 2.01876600  |
| O  | -1 | -1.79359200 | -1.87529300 | -1.99988500 |
| O  | -1 | -1.13525100 | -2.59813300 | 0.09172800  |
| C  | 0  | 0.13994100  | 2.63842400  | 3.49900400  |
| C  | 0  | -0.34721800 | 3.92628800  | 3.74946400  |
| C  | 0  | 1.31156000  | 2.18579300  | 4.11741800  |
| C  | 0  | 0.33784800  | 4.76600700  | 4.62076600  |
| H  | 0  | -1.25577100 | 4.25310000  | 3.25917500  |
| C  | 0  | 1.99488900  | 3.02567200  | 4.98660600  |
| H  | 0  | 1.66744000  | 1.18476700  | 3.90738900  |
| C  | 0  | 1.50860700  | 4.31284300  | 5.23722100  |
| H  | 0  | -0.02093000 | 5.76540200  | 4.82894700  |
| H  | 0  | 2.90485100  | 2.70653700  | 5.48122800  |
| C  | -1 | -4.29170600 | -1.32975400 | 3.67101200  |
| C  | -1 | -3.94188900 | -2.54140900 | 4.27811600  |
| C  | -1 | -5.51987300 | -0.72202500 | 3.95379000  |
| C  | -1 | -4.82246800 | -3.14306400 | 5.16745400  |
| H  | -1 | -2.98539500 | -2.99145800 | 4.04313400  |
| C  | -1 | -6.40136600 | -1.32448600 | 4.84500800  |
| H  | -1 | -5.76794700 | 0.21515800  | 3.47173100  |
| C  | -1 | -6.04991300 | -2.53528300 | 5.45045200  |

|    |    |              |             |             |
|----|----|--------------|-------------|-------------|
| H  | -1 | -4.58093200  | -4.08116200 | 5.65360300  |
| H  | -1 | -7.35590100  | -0.87066500 | 5.07730100  |
| C  | -1 | -1.91685900  | -4.18201800 | -1.49143900 |
| C  | -1 | -1.72244600  | -5.22165900 | -0.57472600 |
| C  | -1 | -2.41365000  | -4.44803700 | -2.77209200 |
| C  | -1 | -2.02614300  | -6.52616100 | -0.94134000 |
| H  | -1 | -1.33624000  | -4.99004600 | 0.41010200  |
| C  | -1 | -2.71705300  | -5.75472600 | -3.13939400 |
| H  | -1 | -2.55555700  | -3.62713800 | -3.46359800 |
| C  | -1 | -2.52236100  | -6.79201900 | -2.22165600 |
| H  | -1 | -1.88686400  | -7.35276000 | -0.25426100 |
| H  | -1 | -3.10202300  | -5.98143600 | -4.12505100 |
| C  | 0  | 2.52802500   | -0.18802700 | -1.61593100 |
| C  | 0  | 3.59878000   | -0.47814000 | -0.76408800 |
| C  | 0  | 2.74896900   | 0.20852200  | -2.93906100 |
| C  | 0  | 4.90180700   | -0.37248100 | -1.23263800 |
| H  | 0  | 3.39591500   | -0.78172200 | 0.25516700  |
| C  | 0  | 4.04710500   | 0.31301200  | -3.41622300 |
| H  | 0  | 1.90178500   | 0.42807500  | -3.57567000 |
| C  | 0  | 5.12236200   | 0.02217800  | -2.56195600 |
| H  | 0  | 5.73639000   | -0.58792200 | -0.57420900 |
| H  | 0  | 4.23841400   | 0.61656400  | -4.43721700 |
| C  | -1 | -1.61225800  | 4.37579400  | -2.17498200 |
| C  | -1 | -1.92118000  | 5.53778800  | -1.45890600 |
| C  | -1 | -1.00021400  | 4.45472200  | -3.43147400 |
| C  | -1 | -1.61815800  | 6.78318700  | -1.99783800 |
| H  | -1 | -2.39507300  | 5.45003500  | -0.48931600 |
| C  | -1 | -0.69766600  | 5.69916900  | -3.96851100 |
| H  | -1 | -0.77108200  | 3.54218200  | -3.96721600 |
| C  | -1 | -1.00617600  | 6.86039600  | -3.25296600 |
| H  | -1 | -1.84838400  | 7.69377100  | -1.46053300 |
| H  | -1 | -0.22338500  | 5.79492500  | -4.93829000 |
| C  | -1 | -6.00955600  | 0.43161400  | -2.03932600 |
| C  | -1 | -6.19492700  | -0.19724000 | -3.27567700 |
| C  | -1 | -7.10797300  | 0.87888600  | -1.29566000 |
| C  | -1 | -7.48066300  | -0.38082000 | -3.77220100 |
| H  | -1 | -5.32901400  | -0.53376200 | -3.83187200 |
| C  | -1 | -8.39165200  | 0.69430600  | -1.79227600 |
| H  | -1 | -6.94003000  | 1.36316900  | -0.34198700 |
| C  | -1 | -8.57704500  | 0.06608600  | -3.02780600 |
| H  | -1 | -7.64588400  | -0.86463500 | -4.72588200 |
| H  | -1 | -9.26305400  | 1.02818400  | -1.24116000 |
| C  | -1 | -0.65974600  | 8.15802000  | -3.87637900 |
| O  | -1 | -0.12032700  | 8.29055100  | -4.97439300 |
| O  | -1 | -1.01361300  | 9.21191500  | -3.08070900 |
| H  | -1 | -0.76928800  | 10.06817300 | -3.52269300 |
| C  | -1 | -9.96854900  | -0.10213900 | -3.50519300 |
| O  | -1 | -10.97188100 | 0.26643800  | -2.89557500 |
| O  | -1 | -10.01448500 | -0.72464000 | -4.72147900 |
| H  | -1 | -10.95862100 | -0.82423900 | -5.01636400 |
| C  | -1 | -6.94686500  | -3.22199200 | 6.40665600  |
| O  | -1 | -6.69547400  | -4.28718300 | 6.96951900  |
| O  | -1 | -8.10936300  | -2.52772800 | 6.59916900  |
| H  | -1 | -8.68993900  | -3.01193500 | 7.24466500  |
| C  | 0  | 2.27995600   | 5.16293000  | 6.17256000  |
| O  | 0  | 3.31498600   | 4.82210000  | 6.74413300  |
| O  | 0  | 1.70269400   | 6.39176700  | 6.33276200  |
| H  | 0  | 2.24072700   | 6.93974000  | 6.96389600  |
| C  | 0  | 6.48670800   | 0.13034600  | -3.06217900 |
| O  | 0  | 7.51713300   | -0.11376500 | -2.36755500 |
| O  | 0  | 6.60466800   | 0.50962100  | -4.32794600 |
| H  | 0  | 7.55359000   | 0.56936500  | -4.62891900 |
| C  | -1 | -2.82702800  | -8.20111800 | -2.55610600 |
| O  | -1 | -2.67872800  | -9.15529600 | -1.79308900 |
| O  | -1 | -3.30033100  | -8.32820600 | -3.83297000 |
| H  | -1 | -3.49403100  | -9.28341900 | -4.02862900 |
| Ti | 0  | 8.80989000   | -0.55748000 | -0.94936200 |
| O  | 0  | 10.41481800  | 0.12305300  | -0.68138600 |
| O  | 0  | 8.00452600   | -0.65853400 | 0.60889000  |
| O  | 0  | 9.56304200   | -2.19860700 | -0.53936700 |
| Ti | 0  | 8.90860300   | -2.24399500 | 1.33381700  |



|    |   |             |             |             |
|----|---|-------------|-------------|-------------|
| Ti | 0 | 11.31893000 | -1.44424900 | 0.04045400  |
| O  | 0 | 8.22742100  | -3.72393700 | 1.62503900  |
| O  | 0 | 10.69842300 | -1.98984200 | 1.69340900  |
| O  | 0 | 12.53596200 | -2.29042300 | -0.69752400 |

## 2. Ethanol solvent

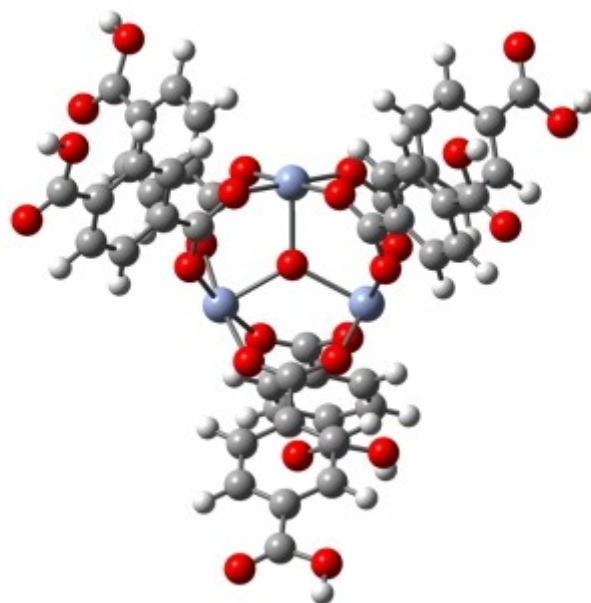

MOF

Energies = -3965.697229 a.u

|    |    |             |             |             |
|----|----|-------------|-------------|-------------|
| O  | -1 | 0.00003800  | -0.01686400 | 0.15049500  |
| Cr | -1 | -0.01007200 | -1.89556300 | -0.99422500 |
| Cr | -1 | 0.00040100  | 0.01027000  | 2.35032700  |
| Cr | -1 | 0.00993500  | 1.86479900  | -0.98935100 |
| C  | 0  | 1.80830800  | -0.02394400 | -2.57455000 |
| O  | 0  | 1.36547300  | 1.12913200  | -2.20763200 |
| O  | 0  | 1.35916200  | -1.17489800 | -2.20804300 |
| C  | 0  | -1.80775400 | -0.00516100 | -2.57559200 |
| O  | 0  | -1.36495500 | -1.15988500 | -2.21349800 |
| O  | 0  | -1.35823100 | 1.14395100  | -2.20437700 |
| C  | 0  | 1.80136900  | -2.35873900 | 1.38875500  |
| O  | 0  | 1.33720100  | -2.60640400 | 0.19832700  |
| O  | 0  | 1.37481100  | -1.48770200 | 2.21803800  |
| C  | 0  | -1.84445400 | -2.32089000 | 1.37945500  |
| C  | 0  | -1.80508800 | 2.35801000  | 1.38820200  |
| C  | 0  | 1.84745800  | 2.32177600  | 1.37798300  |
| O  | 0  | -1.37726100 | 1.49728800  | 2.22842100  |
| O  | 0  | -1.34088800 | 2.58583300  | 0.19500500  |
| O  | 0  | 1.41334200  | 1.46446400  | 2.21839000  |
| O  | 0  | 1.37443600  | 2.56586000  | 0.19129600  |
| O  | 0  | -1.37308700 | -2.58287600 | 0.19482300  |
| O  | 0  | -1.40984700 | -1.45514100 | 2.20994200  |
| C  | 0  | 3.02243500  | 3.15189500  | 1.78473900  |
| C  | 0  | 3.54407800  | 4.11098300  | 0.90973300  |
| C  | 0  | 3.59142100  | 2.95937900  | 3.04892100  |
| C  | 0  | 4.63564100  | 4.88070500  | 1.29722200  |
| H  | 0  | 3.08714000  | 4.24092300  | -0.06314200 |
| C  | 0  | 4.68160200  | 3.72764500  | 3.43546200  |
| H  | 0  | 3.16935000  | 2.21071400  | 3.70765800  |
| C  | 0  | 5.20232800  | 4.68696600  | 2.56108500  |
| H  | 0  | 5.05398800  | 5.62787600  | 0.63555500  |
| H  | 0  | 5.14460400  | 3.60261900  | 4.40742300  |
| C  | 0  | -2.95960400 | 3.21218100  | 1.80319100  |
| C  | 0  | -3.52024900 | 3.03495600  | 3.07333100  |
| C  | 0  | -3.47087600 | 4.17816400  | 0.92964400  |

|   |   |             |             |             |
|---|---|-------------|-------------|-------------|
| C | 0 | -4.59185600 | 3.82530800  | 3.46719800  |
| H | 0 | -3.10663300 | 2.28042100  | 3.73073300  |
| C | 0 | -4.54365600 | 4.97017000  | 1.32459200  |
| H | 0 | -3.02075600 | 4.29596800  | -0.04795000 |
| C | 0 | -5.10218100 | 4.79153900  | 2.59429300  |
| H | 0 | -5.04821700 | 3.71239700  | 4.44377400  |
| H | 0 | -4.95374600 | 5.72299100  | 0.66417600  |
| C | 0 | -3.02163500 | -3.14456700 | 1.79548900  |
| C | 0 | -3.59045400 | -2.93612000 | 3.05718400  |
| C | 0 | -3.54562000 | -4.11232400 | 0.93153600  |
| C | 0 | -4.68285500 | -3.69688200 | 3.45224800  |
| H | 0 | -3.16643300 | -2.18112800 | 3.70741300  |
| C | 0 | -4.63946600 | -4.87453100 | 1.32746400  |
| H | 0 | -3.08866200 | -4.25476200 | -0.03956000 |
| C | 0 | -5.20610900 | -4.66468400 | 2.58877200  |
| H | 0 | -5.14564200 | -3.55948400 | 4.42265600  |
| H | 0 | -5.05961000 | -5.62813600 | 0.67426700  |
| C | 0 | 2.95804500  | -3.20644300 | 1.81347100  |
| C | 0 | 3.51826500  | -3.01337900 | 3.08145900  |
| C | 0 | 3.47187000  | -4.18105500 | 0.95109500  |
| C | 0 | 4.59194500  | -3.79634100 | 3.48434400  |
| H | 0 | 3.10252400  | -2.25262100 | 3.73030800  |
| C | 0 | 4.54703900  | -4.96539700 | 1.35484100  |
| H | 0 | 3.02197200  | -4.31124800 | -0.02501400 |
| C | 0 | 5.10513700  | -4.77086200 | 2.62239300  |
| H | 0 | 5.04778800  | -3.67119800 | 4.45968500  |
| H | 0 | 4.95925000  | -5.72443000 | 0.70289100  |
| C | 0 | 2.95509300  | -0.02715100 | -3.52830800 |
| C | 0 | 3.49119300  | 1.18708200  | -3.97166900 |
| C | 0 | 3.48575800  | -1.24420000 | -3.97168300 |
| C | 0 | 4.56058400  | 1.18755200  | -4.86024200 |
| H | 0 | 3.06301800  | 2.11486700  | -3.61360300 |
| C | 0 | 4.55399100  | -1.24255800 | -4.85896800 |
| H | 0 | 3.05463700  | -2.17097700 | -3.61480400 |
| C | 0 | 5.08973200  | -0.02922600 | -5.30203700 |
| H | 0 | 4.99032300  | 2.11518200  | -5.21478300 |
| H | 0 | 4.98862800  | -2.16710500 | -5.22075900 |
| C | 0 | -2.95454400 | 0.00199900  | -3.52925800 |
| C | 0 | -3.49100500 | -1.21025300 | -3.97744600 |
| C | 0 | -3.48484500 | 1.22099900  | -3.96778400 |
| C | 0 | -4.56038000 | -1.20681800 | -4.86602400 |
| H | 0 | -3.06316700 | -2.13962100 | -3.62311700 |
| C | 0 | -4.55303700 | 1.22326200  | -4.85513700 |
| H | 0 | -3.05334800 | 2.14617300  | -3.60719500 |
| C | 0 | -5.08911600 | 0.01186900  | -5.30305600 |
| H | 0 | -4.99036900 | -2.13287600 | -5.22434700 |
| H | 0 | -4.98728700 | 2.14942000  | -5.21324600 |
| C | 0 | 6.22799100  | -0.09106200 | -6.24675600 |
| O | 0 | 6.73769700  | -1.12804400 | -6.66962600 |
| O | 0 | 6.65717400  | 1.15709900  | -6.60448300 |
| H | 0 | 7.42060300  | 1.08417200  | -7.23695400 |
| C | 0 | -6.22711100 | 0.07764100  | -6.24783900 |
| O | 0 | -6.73635100 | 1.11634400  | -6.66700400 |
| O | 0 | -6.65718100 | -1.16902300 | -6.60971300 |
| H | 0 | -7.42067500 | -1.09350000 | -7.24179400 |
| C | 0 | -6.24366100 | 5.60478900  | 3.06921600  |
| O | 0 | -6.77865900 | 5.49446800  | 4.17194700  |
| O | 0 | -6.64674800 | 6.51167400  | 2.12759600  |
| H | 0 | -7.41271000 | 7.04135300  | 2.47527700  |
| C | 0 | 6.36322500  | 5.47686600  | 3.02824600  |
| O | 0 | 6.90551800  | 5.35330200  | 4.12599500  |
| O | 0 | 6.77559100  | 6.37835200  | 2.08542400  |
| H | 0 | 7.55419200  | 6.89270600  | 2.42800800  |
| C | 0 | 6.24901300  | -5.57529300 | 3.10630900  |
| O | 0 | 6.78316600  | -5.45175300 | 4.20805500  |
| O | 0 | 6.65559600  | -6.49073500 | 2.17445800  |
| H | 0 | 7.42308400  | -7.01416300 | 2.52817400  |
| C | 0 | -6.36952100 | -5.44569100 | 3.06436700  |
| O | 0 | -6.91165300 | -5.30846600 | 4.16058500  |
| O | 0 | -6.78395800 | -6.35701600 | 2.13190300  |
| H | 0 | -7.56394300 | -6.86534000 | 2.48027300  |

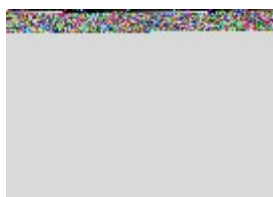

(TiO<sub>2</sub>)<sub>3</sub>

Energies = -623.724729 a.u

|    |             |             |             |
|----|-------------|-------------|-------------|
| Ti | 0.00027100  | 1.81917900  | 0.29849600  |
| O  | -1.39741800 | 1.31669600  | -0.61859700 |
| O  | 1.39867700  | 1.31579100  | -0.61762900 |
| O  | -0.00049300 | 0.11297300  | 1.00077900  |
| Ti | 1.42309900  | -0.60589000 | -0.19625700 |
| Ti | -1.42371900 | -0.60555400 | -0.19660900 |
| O  | 2.52909900  | -1.44300300 | 0.70235600  |
| O  | -0.00035500 | -1.53118400 | -0.91082800 |
| O  | -2.52855000 | -1.44254300 | 0.70343500  |

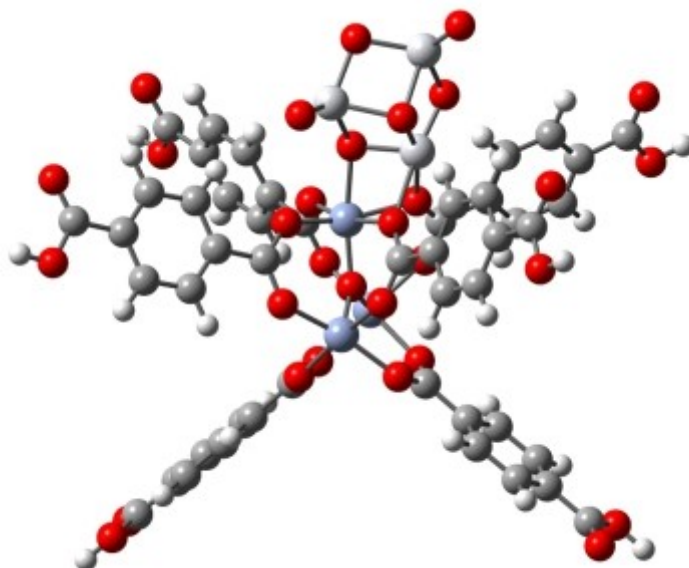

MOF-(TiO<sub>2</sub>)<sub>3</sub>-C

Energies = -4589.554264 a.u

|    |   |             |             |             |
|----|---|-------------|-------------|-------------|
| O  | 0 | -0.55081500 | 0.71204000  | -0.01049400 |
| Cr | 0 | -0.85810800 | 1.79459100  | 1.46477300  |
| Cr | 0 | 0.07143800  | -1.13410000 | 0.26458400  |
| Cr | 0 | -0.78044000 | 1.35248400  | -1.74110700 |
| C  | 0 | -3.10107800 | 2.53180300  | -0.31180400 |
| O  | 0 | -2.50479600 | 2.14851100  | -1.38945800 |
| O  | 0 | -2.54687000 | 2.49204800  | 0.85468700  |
| C  | 0 | 0.35503200  | 3.76296300  | -0.40895900 |
| O  | 0 | 0.04366900  | 3.37461400  | 0.78244000  |
| O  | 0 | 0.08161000  | 3.06525600  | -1.46095400 |
| C  | 0 | -1.85753200 | -0.79955100 | 2.51166800  |
| O  | 0 | -1.82312700 | 0.49066700  | 2.51826300  |
| O  | 0 | -1.16270500 | -1.52000200 | 1.69778200  |
| C  | 0 | 1.68925100  | 0.45072800  | 2.37891100  |
| C  | 0 | 1.77853000  | -0.17332200 | -2.16179000 |
| C  | 0 | -1.77033100 | -1.43989400 | -2.06628300 |
| O  | 0 | 1.66141000  | -0.88569700 | -1.06786800 |
| O  | 0 | 0.88667900  | 0.67924000  | -2.50273700 |
| O  | 0 | -1.13562500 | -1.90404600 | -1.04199000 |
| O  | 0 | -1.68694500 | -0.20945900 | -2.44776600 |
| O  | 0 | 0.76806700  | 1.33693700  | 2.44512800  |

|   |    |             |             |             |
|---|----|-------------|-------------|-------------|
| O | 0  | 1.61924100  | -0.54815300 | 1.52587400  |
| C | -1 | -2.64667900 | -2.36404200 | -2.82750000 |
| C | -1 | -3.40976600 | -1.86102400 | -3.88687100 |
| C | -1 | -2.75447300 | -3.70731000 | -2.44938100 |
| C | -1 | -4.28201700 | -2.70046000 | -4.57145600 |
| H | -1 | -3.30939400 | -0.81826000 | -4.16024200 |
| C | -1 | -3.62578900 | -4.54519100 | -3.13268500 |
| H | -1 | -2.15313200 | -4.07229500 | -1.62612400 |
| C | -1 | -4.38779400 | -4.04247700 | -4.19222000 |
| H | -1 | -4.88090100 | -2.33127100 | -5.39372000 |
| H | -1 | -3.73203800 | -5.58985600 | -2.86417400 |
| C | -1 | 2.98097100  | -0.34340200 | -3.01549500 |
| C | -1 | 3.93683600  | -1.30793600 | -2.67640200 |
| C | -1 | 3.18892100  | 0.51060700  | -4.10408700 |
| C | -1 | 5.09947200  | -1.41625100 | -3.42785000 |
| H | -1 | 3.75249200  | -1.95670900 | -1.82923700 |
| C | -1 | 4.35307300  | 0.40146000  | -4.85704800 |
| H | -1 | 2.43523400  | 1.24917800  | -4.34625300 |
| C | -1 | 5.30675900  | -0.56319700 | -4.51657800 |
| H | -1 | 5.85880600  | -2.15241500 | -3.19080600 |
| H | -1 | 4.53302800  | 1.05206500  | -5.70285700 |
| C | -1 | 2.86479600  | 0.55941900  | 3.27605200  |
| C | -1 | 3.83588000  | -0.44752200 | 3.23193400  |
| C | -1 | 3.03570100  | 1.67486700  | 4.10315400  |
| C | -1 | 4.97653400  | -0.33646400 | 4.01599200  |
| H | -1 | 3.68011100  | -1.30084000 | 2.58371400  |
| C | -1 | 4.17796900  | 1.78581400  | 4.88873100  |
| H | -1 | 2.27077600  | 2.44085800  | 4.11970900  |
| C | -1 | 5.14691300  | 0.77829600  | 4.84322100  |
| H | -1 | 5.74656300  | -1.09912900 | 4.00420400  |
| H | -1 | 4.32911900  | 2.64037400  | 5.53525200  |
| C | -1 | -2.74823200 | -1.49406200 | 3.47061600  |
| C | -1 | -2.83606900 | -2.89091100 | 3.46729800  |
| C | -1 | -3.55192500 | -0.73410800 | 4.32742600  |
| C | -1 | -3.72822700 | -3.52495200 | 4.32180400  |
| H | -1 | -2.20325400 | -3.45650900 | 2.79480700  |
| C | -1 | -4.44522500 | -1.36926900 | 5.18345000  |
| H | -1 | -3.46630300 | 0.34503800  | 4.31132500  |
| C | -1 | -4.53117800 | -2.76518900 | 5.17856900  |
| H | -1 | -3.81983300 | -4.60472300 | 4.34292900  |
| H | -1 | -5.07573600 | -0.79981800 | 5.85372600  |
| C | -1 | -4.48464800 | 3.03511700  | -0.41704500 |
| C | -1 | -5.10694000 | 3.09685000  | -1.66895300 |
| C | -1 | -5.16755400 | 3.43317400  | 0.73819800  |
| C | -1 | -6.41514500 | 3.55699800  | -1.76907000 |
| H | -1 | -4.55728200 | 2.78283000  | -2.54735900 |
| C | -1 | -6.47420000 | 3.89235800  | 0.63707300  |
| H | -1 | -4.66566100 | 3.37638100  | 1.69581000  |
| C | -1 | -7.09608000 | 3.95406700  | -0.61391000 |
| H | -1 | -6.91491900 | 3.61197200  | -2.72723300 |
| H | -1 | -7.03111400 | 4.20718600  | 1.51189900  |
| C | -1 | 1.06751400  | 5.05331100  | -0.57531400 |
| C | -1 | 1.38558500  | 5.82017900  | 0.55116800  |
| C | -1 | 1.44881300  | 5.47464400  | -1.85460100 |
| C | -1 | 2.08668200  | 7.01146200  | 0.40132800  |
| H | -1 | 1.07960400  | 5.47231700  | 1.52978200  |
| C | -1 | 2.14918600  | 6.66454500  | -2.00308500 |
| H | -1 | 1.19166000  | 4.86459700  | -2.71126700 |
| C | -1 | 2.46701300  | 7.43091400  | -0.87740800 |
| H | -1 | 2.34316900  | 7.61900900  | 1.25921600  |
| H | -1 | 2.45981300  | 7.01855600  | -2.97918500 |
| C | -1 | -8.48984900 | 4.45142100  | -0.65860500 |
| O | -1 | -9.14119300 | 4.81281500  | 0.32072900  |
| O | -1 | -8.98152500 | 4.46545500  | -1.93458700 |
| H | -1 | -9.91678100 | 4.80228600  | -1.93326100 |
| C | -1 | 3.21505500  | 8.68933900  | -1.09825300 |
| O | -1 | 3.57831100  | 9.11027300  | -2.19588200 |
| O | -1 | 3.46173900  | 9.34431700  | 0.07658100  |
| H | -1 | 3.96506800  | 10.18263100 | -0.10242500 |
| C | -1 | 6.56334900  | -0.72611000 | -5.28100200 |
| O | -1 | 7.43973000  | -1.55300200 | -5.03077400 |

|    |    |             |             |             |
|----|----|-------------|-------------|-------------|
| O  | -1 | 6.64481100  | 0.16230300  | -6.31813900 |
| H  | -1 | 7.49748800  | 0.02823600  | -6.81119800 |
| C  | -1 | -5.29741200 | -4.98246300 | -4.88423400 |
| O  | -1 | -5.43513200 | -6.17137700 | -4.59801700 |
| O  | -1 | -5.98256900 | -4.37110600 | -5.89835400 |
| H  | -1 | -6.58305800 | -5.02662600 | -6.34315700 |
| C  | -1 | -5.46217500 | -3.49560900 | 6.06708900  |
| O  | -1 | -5.58420300 | -4.71944600 | 6.10901700  |
| O  | -1 | -6.18726000 | -2.64253300 | 6.85334600  |
| H  | -1 | -6.80155600 | -3.16184000 | 7.43737500  |
| C  | -1 | 6.38124500  | 0.84156900  | 5.65692200  |
| O  | -1 | 7.26879500  | -0.01088200 | 5.66099200  |
| O  | -1 | 6.42735400  | 1.97546900  | 6.42105900  |
| H  | -1 | 7.26538400  | 1.98834800  | 6.95554100  |
| Ti | 0  | 2.72517800  | -2.11281100 | 0.46160900  |
| O  | 0  | 3.81348300  | -3.04017400 | 1.53253400  |
| O  | 0  | 0.92794400  | -2.80682000 | 0.46563500  |
| O  | 0  | 3.01628800  | -3.65062500 | -0.79265600 |
| Ti | 0  | 1.30928000  | -4.48543700 | -0.44982800 |
| Ti | 0  | 3.90210700  | -4.70265800 | 0.57618800  |
| O  | 0  | 0.55861800  | -5.09115600 | -1.80080600 |
| O  | 0  | 2.30636400  | -5.65188300 | 0.56859100  |
| O  | 0  | 5.31668400  | -5.39235200 | 0.03577500  |

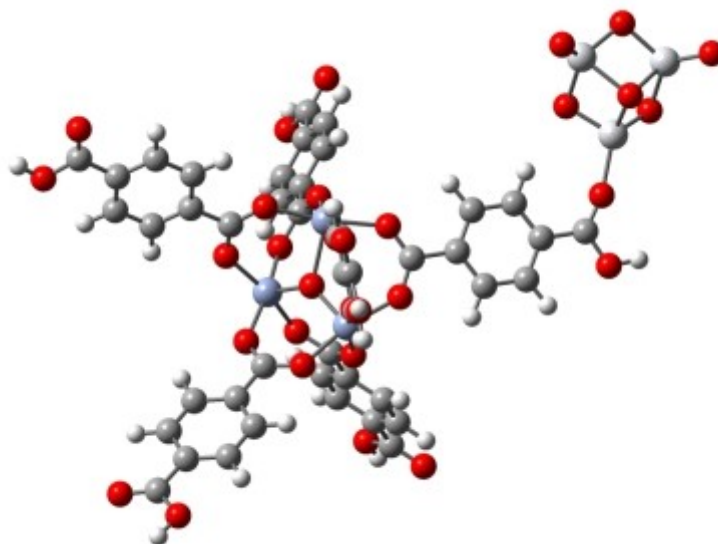

# MOF-(TiO<sub>2</sub>)<sub>3</sub>-S

Energies = -4589.461844 a.u

|    |    |             |             |             |
|----|----|-------------|-------------|-------------|
| O  | 0  | -1.98908300 | 0.25455400  | 0.07438100  |
| Cr | 0  | -1.83656600 | 0.15448800  | -1.90215400 |
| Cr | 0  | -0.82359700 | -0.76391900 | 1.06965000  |
| Cr | 0  | -3.21899400 | 1.43439300  | 0.73420500  |
| C  | -1 | -2.36412500 | 3.05975900  | -1.60230500 |
| O  | -1 | -2.91854600 | 2.98859800  | -0.44132600 |
| O  | -1 | -1.95239500 | 2.07330000  | -2.32211700 |
| C  | -1 | -4.77935400 | 0.36965900  | -1.52296500 |
| O  | -1 | -3.77511900 | 0.04959000  | -2.26434000 |
| O  | -1 | -4.73554800 | 0.96045200  | -0.37868600 |
| C  | 0  | 1.04196300  | -0.00256500 | -1.10268200 |
| O  | 0  | 0.14003600  | 0.28249300  | -1.95997700 |
| O  | 0  | 0.80126500  | -0.42966400 | 0.09809100  |
| C  | -1 | -1.39154400 | -2.69199400 | -1.12879800 |
| C  | -1 | -3.33100800 | -0.81768500 | 2.69470700  |
| C  | 0  | -0.88442000 | 1.81669100  | 2.54411900  |
| O  | -1 | -2.16601700 | -1.28885000 | 2.46965700  |
| O  | -1 | -3.85316000 | 0.25796400  | 2.18339600  |
| O  | 0  | -0.33249000 | 0.68047300  | 2.27693600  |

|   |    |              |             |             |
|---|----|--------------|-------------|-------------|
| O | 0  | -1.98673000  | 2.22624900  | 2.02000700  |
| O | -1 | -1.69731200  | -1.80921300 | -2.03509700 |
| O | -1 | -0.95533800  | -2.47039300 | 0.04964600  |
| C | 0  | -0.20551100  | 2.70083900  | 3.52093700  |
| C | 0  | -0.77331700  | 3.93946400  | 3.84205800  |
| C | 0  | 0.99544700   | 2.28951600  | 4.11193300  |
| C | 0  | -0.13958500  | 4.77168300  | 4.75755200  |
| H | 0  | -1.70288400  | 4.23401300  | 3.37102700  |
| C | 0  | 1.62643700   | 3.12266200  | 5.02603300  |
| H | 0  | 1.41548300   | 1.32707700  | 3.84786200  |
| C | 0  | 1.05980700   | 4.36006900  | 5.34730500  |
| H | 0  | -0.56015100  | 5.73313100  | 5.02090200  |
| H | 0  | 2.55669600   | 2.83579700  | 5.50214200  |
| C | -1 | -4.20355400  | -1.56377300 | 3.65217700  |
| C | -1 | -3.71950000  | -2.73260200 | 4.25094000  |
| C | -1 | -5.48895700  | -1.09540200 | 3.94539200  |
| C | -1 | -4.52299500  | -3.43074100 | 5.14263800  |
| H | -1 | -2.72133500  | -3.07445300 | 4.00725700  |
| C | -1 | -6.29326400  | -1.79434100 | 4.83908700  |
| H | -1 | -5.84130100  | -0.18925500 | 3.46902400  |
| C | -1 | -5.80747700  | -2.96191100 | 5.43641000  |
| H | -1 | -4.17749400  | -4.33906500 | 5.62252500  |
| H | -1 | -7.29021700  | -1.44892200 | 5.07956600  |
| C | -1 | -1.57171500  | -4.11882400 | -1.53986400 |
| C | -1 | -1.26077600  | -5.13676800 | -0.63102700 |
| C | -1 | -2.04505400  | -4.42951000 | -2.81930000 |
| C | -1 | -1.42394400  | -6.46423600 | -1.00436300 |
| H | -1 | -0.89601300  | -4.87028000 | 0.35311600  |
| C | -1 | -2.20804300  | -5.75909000 | -3.19329100 |
| H | -1 | -2.27921200  | -3.62461900 | -3.50446100 |
| C | -1 | -1.89648300  | -6.77464900 | -2.28357200 |
| H | -1 | -1.19196500  | -7.27510100 | -0.32360900 |
| H | -1 | -2.57263800  | -6.02054700 | -4.17808400 |
| C | 0  | 2.46902000   | 0.15602700  | -1.48931900 |
| C | 0  | 3.47888200   | -0.18130900 | -0.58115600 |
| C | 0  | 2.78119000   | 0.63535300  | -2.76671900 |
| C | 0  | 4.80890700   | -0.04650500 | -0.95283100 |
| H | 0  | 3.20919200   | -0.54850200 | 0.40066400  |
| C | 0  | 4.10882400   | 0.78000100  | -3.14132200 |
| H | 0  | 1.97857100   | 0.88678500  | -3.44820100 |
| C | 0  | 5.12236600   | 0.43393400  | -2.23338300 |
| H | 0  | 5.59960500   | -0.30902900 | -0.26069600 |
| H | 0  | 4.36955000   | 1.15044600  | -4.12423300 |
| C | -1 | -2.18714000  | 4.42510900  | -2.17613200 |
| C | -1 | -2.61500500  | 5.54263500  | -1.45059800 |
| C | -1 | -1.59441900  | 4.57747400  | -3.43504600 |
| C | -1 | -2.45091800  | 6.81677000  | -1.98240200 |
| H | -1 | -3.07021600  | 5.39809400  | -0.47888700 |
| C | -1 | -1.43080300  | 5.85051700  | -3.96512900 |
| H | -1 | -1.27106100  | 3.69824100  | -3.97775500 |
| C | -1 | -1.85834800  | 6.96726400  | -3.24015500 |
| H | -1 | -2.77411400  | 7.69405500  | -1.43762100 |
| H | -1 | -0.97495100  | 6.00315500  | -4.93646200 |
| C | -1 | -6.13317200  | 0.02773400  | -2.04729600 |
| C | -1 | -6.25566300  | -0.61164900 | -3.28600600 |
| C | -1 | -7.26980900  | 0.34887200  | -1.29602600 |
| C | -1 | -7.51628600  | -0.93215600 | -3.77718000 |
| H | -1 | -5.36110400  | -0.84963800 | -3.84765200 |
| C | -1 | -8.52839700  | 0.02812900  | -1.78747000 |
| H | -1 | -7.15021000  | 0.84338200  | -0.34034900 |
| C | -1 | -8.65083100  | -0.61077400 | -3.02532900 |
| H | -1 | -7.63311400  | -1.42710400 | -4.73229600 |
| H | -1 | -9.42820000  | 0.26208900  | -1.23051300 |
| C | -1 | -1.65676900  | 8.29823300  | -3.85646800 |
| O | -1 | -1.14122100  | 8.49515700  | -4.95618700 |
| O | -1 | -2.11732700  | 9.30351900  | -3.05188100 |
| H | -1 | -1.96816900  | 10.18314700 | -3.49025100 |
| C | -1 | -10.01801300 | -0.92772700 | -3.49684700 |
| O | -1 | -11.05275300 | -0.67252000 | -2.88194100 |
| O | -1 | -10.00202200 | -1.54757200 | -4.71570800 |
| H | -1 | -10.93140600 | -1.74876400 | -5.00539700 |



|    |    |             |             |             |
|----|----|-------------|-------------|-------------|
| C  | -1 | -6.61718400 | -3.74655600 | 6.39485200  |
| O  | -1 | -6.24738500 | -4.78011600 | 6.95110300  |
| O  | -1 | -7.84762900 | -3.18435800 | 6.59858800  |
| H  | -1 | -8.36634400 | -3.73274700 | 7.24538400  |
| C  | 0  | 1.77883300  | 5.20464400  | 6.32918800  |
| O  | 0  | 2.83510100  | 4.89890600  | 6.88068000  |
| O  | 0  | 1.12409300  | 6.38267400  | 6.55707000  |
| H  | 0  | 1.62683800  | 6.92800100  | 7.21883700  |
| C  | 0  | 6.52046100  | 0.56217300  | -2.61859600 |
| O  | 0  | 7.48419600  | 0.23304000  | -1.86504500 |
| O  | 0  | 6.73945300  | 1.05348700  | -3.83141300 |
| H  | 0  | 7.70760800  | 1.11836000  | -4.05965200 |
| C  | -1 | -2.04877000 | -8.20624700 | -2.62566300 |
| O  | -1 | -1.79201500 | -9.14378200 | -1.87098800 |
| O  | -1 | -2.51518100 | -8.37618300 | -3.90055400 |
| H  | -1 | -2.60553100 | -9.34573800 | -4.10038100 |
| Ti | 0  | 8.97430700  | -0.40286000 | -0.74899100 |
| O  | 0  | 10.45792400 | 0.53083900  | -0.68209300 |
| O  | 0  | 8.54416800  | -0.82436100 | 0.90185600  |
| O  | 0  | 10.05501700 | -1.91158700 | -0.72784800 |
| Ti | 0  | 9.80269200  | -2.28489200 | 1.20576100  |
| Ti | 0  | 11.74209300 | -0.91220300 | -0.35920500 |
| O  | 0  | 9.41914500  | -3.87922300 | 1.42690400  |
| O  | 0  | 11.56197900 | -1.73280900 | 1.28243400  |
| O  | 0  | 12.92538300 | -1.41832700 | -1.39874700 |
